# Supplementary material
Source: Springer Nature journal article supplement (https://www.springermedizin.de/resource/supplementary/12885_2006_532_MOESM4_ESM.pdf/9469700)

5' to 3'

-10 kb -8 kb -6 kb -4 kb -2 kb TSS +2 kb +4 kb +6 kb +8 kb +10 kb

CpG  
island*CDH1**RABGEF1**STAG1**MYBPC2**VDR**ESR2**MLH1**FLJ43855**PTEN**CDKN2A**PAX5**RUNX2**RUNX3**KIAA1752**MUC8*Non-island  
CpG*MAGEA2**DDX53**TFF2**SERPINB5**MSLN*Symbols for retroelements ■, *Alu*; ▨, L1; □, LTR; TSS, transcription start site; —, CpG island; ↓, Primer site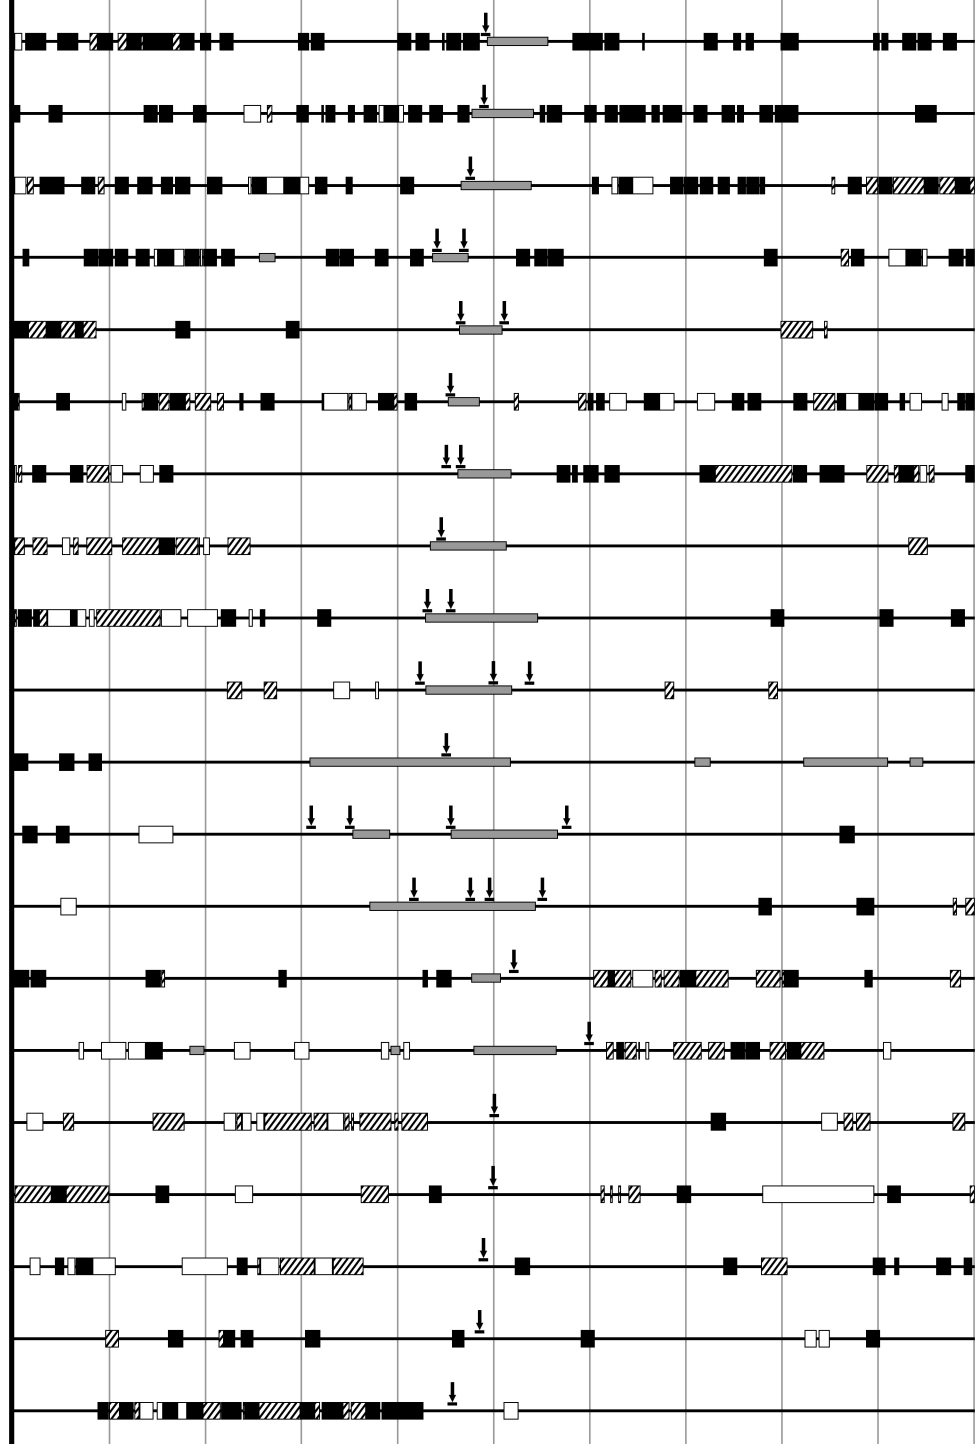

Supplement: MOESM4 [file 9469700]
